# Supplementary material for: Portable real-time colorimetric LAMP-device for rapid quantitative detection of nucleic acids in crude samples
Source: bioRxiv or medRxiv preprint supplement (doi:10.1101/2020.07.22.215251), 2021-05-27
Supplement: Supplementary file [file media-1.pdf]

## ***Supplementary Material***

# **Real-time colorimetric LAMP methodology for quantitative nucleic acids detection at the point-of-care**

**George Papadakis<sup>1,\*</sup>, Alexandros K. Pantazis<sup>1,#</sup>, Nikolaos Fikas<sup>1,2</sup>, Stella Chatziioannidou<sup>1,2</sup>, Kleita Michaelidou<sup>3</sup>, Vasiliki Pogka<sup>4</sup>, Maria Megariti<sup>1</sup>, Maria Vardaki<sup>1</sup>, Konstantinos Giarentis<sup>2</sup>, Judith Heaney<sup>5,6</sup>, Eleni Nastouli<sup>5,6</sup>, Timokratis Karamitros<sup>4</sup>, Andreas Mentis<sup>4</sup>, Sofia Agelaki<sup>3</sup>, Electra Gizeli<sup>1,2</sup>**

<sup>1</sup> Institute of Molecular Biology and Biotechnology, Foundation for Research and Technology-Hellas, 100 N. Plastira Str., Heraklion 70013, Greece

<sup>2</sup> Department of Biology, University of Crete, Voutes, Heraklion 70013, Greece

<sup>3</sup> Laboratory of Translational Oncology, School of Medicine, University of Crete, Heraklion, 71110, Greece

<sup>4</sup> Department of Medical Oncology, University General Hospital, Heraklion, 71110, Greece

<sup>5</sup> National SARS-CoV-2 Reference Laboratory, Hellenic Pasteur Institute, 127 Vas. Sofias Ave., Athens 11521, Greece

<sup>6</sup> Advanced Pathogens Diagnostics Unit, University College London Hospitals NHS Trust, London WC1H 9AX

<sup>7</sup> UCL Great Ormond Street Institute of Child Health

\*Corresponding authors: [gpapadak@imbb.forth.gr](mailto:gpapadak@imbb.forth.gr); [gizeli@imbb.forth.gr](mailto:gizeli@imbb.forth.gr)

## **Contents**

|                                                         |   |
|---------------------------------------------------------|---|
| In-house developed Android application .....            | 2 |
| Digital image analysis .....                            | 3 |
| Performance evaluation .....                            | 4 |
| qLAMP curves for Influenza/SARS-CoV-2 .....             | 5 |
| Electronics design and smartphone app development ..... | 6 |
| References .....                                        | 7 |

## In-house developed Android application

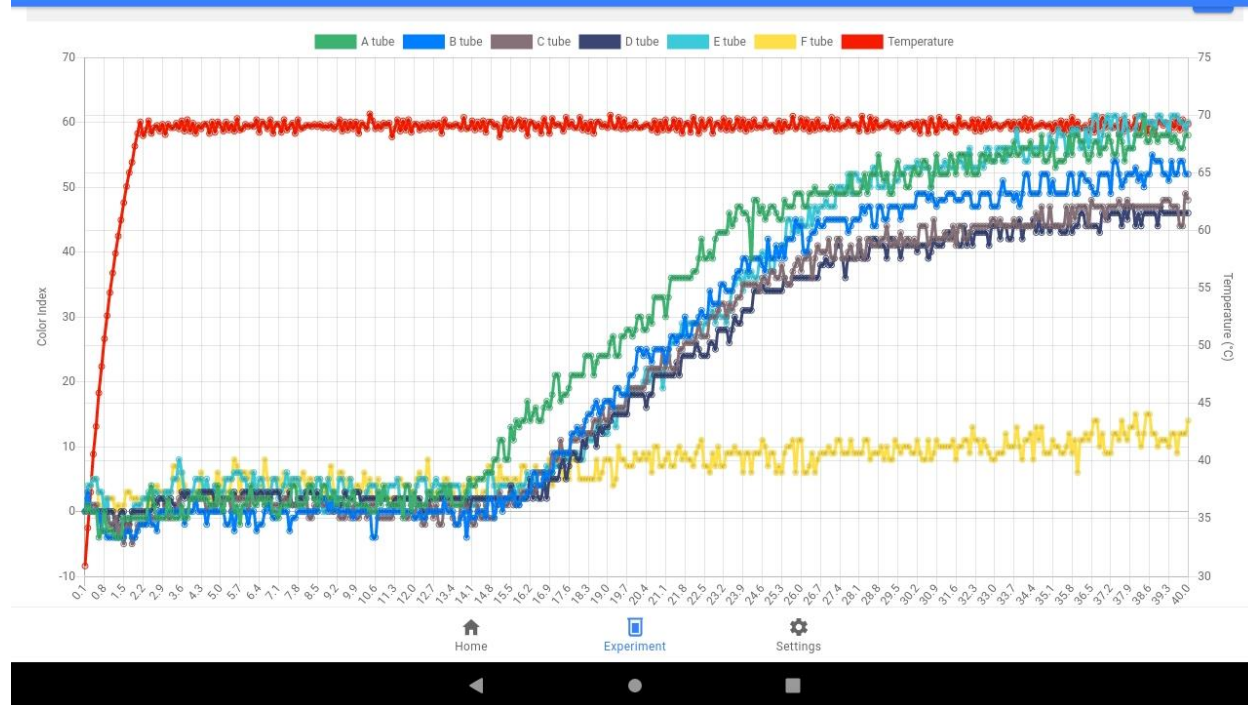

**Fig. S1:** Screenshot of the in-house developed Android application. The settings to be adjusted include the temperature, run time, type of dye, time interval for capturing images and option for USB storage.

## Digital image analysis

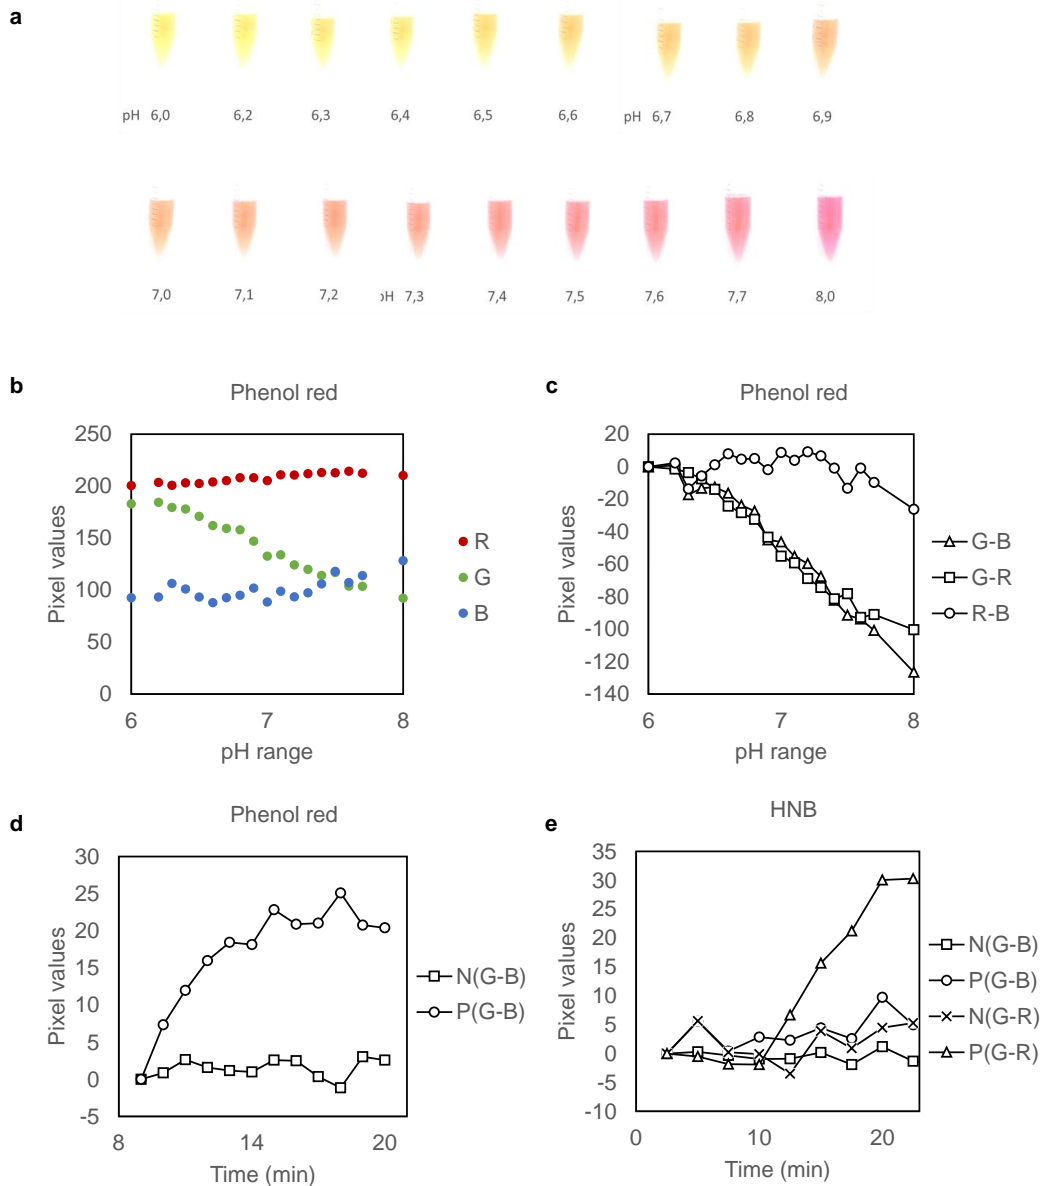

**Fig. S2:** (a) Series of images corresponding to different pH values between pH 6 and 8 in respect to the phenol red indicator. Image source: <https://www.testallcolour.com/blog/post/what-is-phenol-red-in-swimming-pools/>. (b) Raw pixel values extracted from several images (see a) correlating different pH values to color change using the phenol red pH indicator. (c) phenol red: change in pixels as function of pH using data from figure S2b and following three formulas; Green-Blue (G-B), Green-Red (G-R) and Red-Blue (R-B). (d) Change in pixels of phenol red based LAMP reactions spiked with 0 (N) and  $10^5$  (P) lysed bacteria by applying the Green-Blue formula. The first 8 minutes were omitted. Reactions took place in a pre-warmed oven at 63°C with a glass door that allowed video capturing with a camera placed outside the door. (e) Change in pixels of HNB based LAMP reactions spiked with 0 (N) and  $10^5$  (P) bacteria by applying the Green-Blue and Green-Red formulas. With the HNB indicator, the Green-Red formula resulted in better discrimination (Fig. S2e); this could be explained by the fact that the purple to sky blue transition involved more prominent changes in the green and red than in the blue channel.

## Performance evaluation

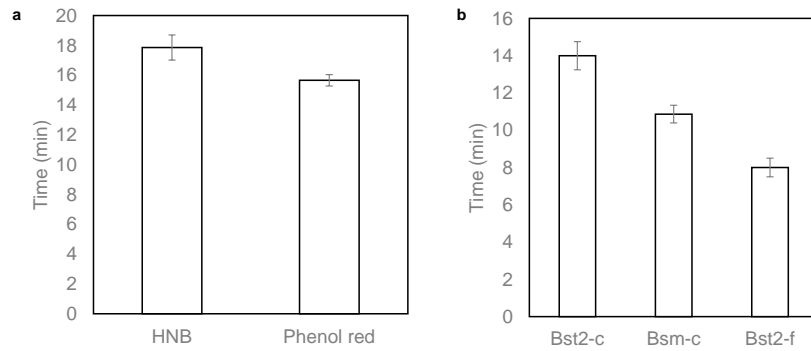

**Fig. S3:** (a) Variation in the time point (min) in which LAMP preparations (containing the same amount of starting template but different color indicator) show a change in the slope of the real-time colorimetric curve when changing the position of the tube inside the tubes holder (see Fig. 1b). Each bar is the average of 3 replicates at 2 different slots in the holder (total of 6 measurements). (b) Comparison of the speed of detection of a LAMP reaction containing 10 bacteria as starting template using different combinations of 2 enzymes (Bst2, Bsm), 2 colorimetric indicators (HNB, phenol red) and inside 2 real time systems (qcLAMP device, BIORAD). Bst2-c: Bst2 warm start polymerase mixed with either phenol red or HNB, tested with qcLAMP; Bsm-c: Bsm polymerase (20 Units) with HNB, tested with qcLAMP; Bst2-f: Bst2 warm start with LAMP fluorescent dye tested in a real-time PCR machine.

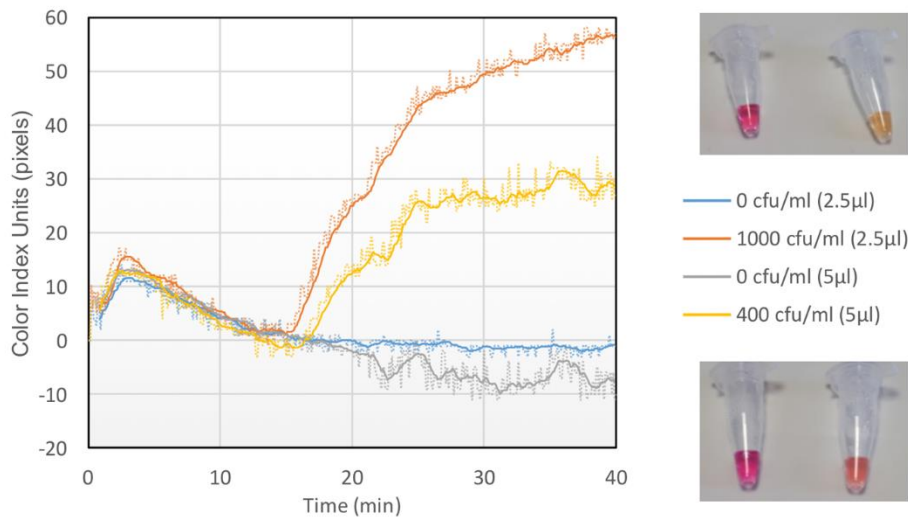

**Fig. S4:** Left: Real time colorimetric curves monitored during qcLAMP amplification performed with 2 different bacteria concentrations (400 and 1000 CFU/ml) spiked in saliva samples. The two concentrations were chosen based on previously reported detection limits of bacteria using end-point colorimetric LAMP or biosensors<sup>1, 2</sup>. Both were successfully detected in less than 17 min while zero background signal was monitored for the negative controls. Right, top: Picture of end-point reactions with 0 or 1000 CFU/ml after 40 min of incubation. Right bottom: Picture of end-point reactions with 0 or 400 CFU/ml after 40 min of incubation.

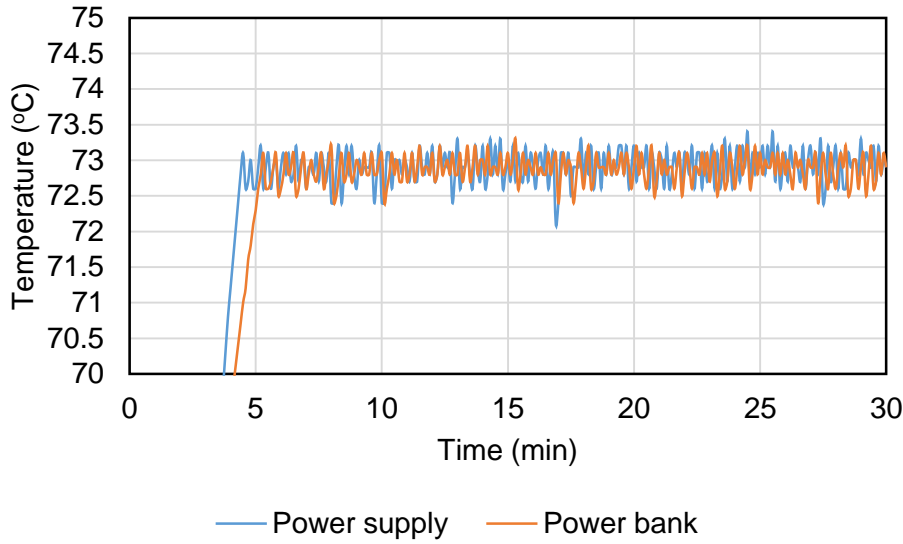

**Fig. S5:** Temperature stability during operation of the qcLAMP device with a power bank and in comparison to a standard power supply.

### qcLAMP curves for Influenza/SARS-CoV-2

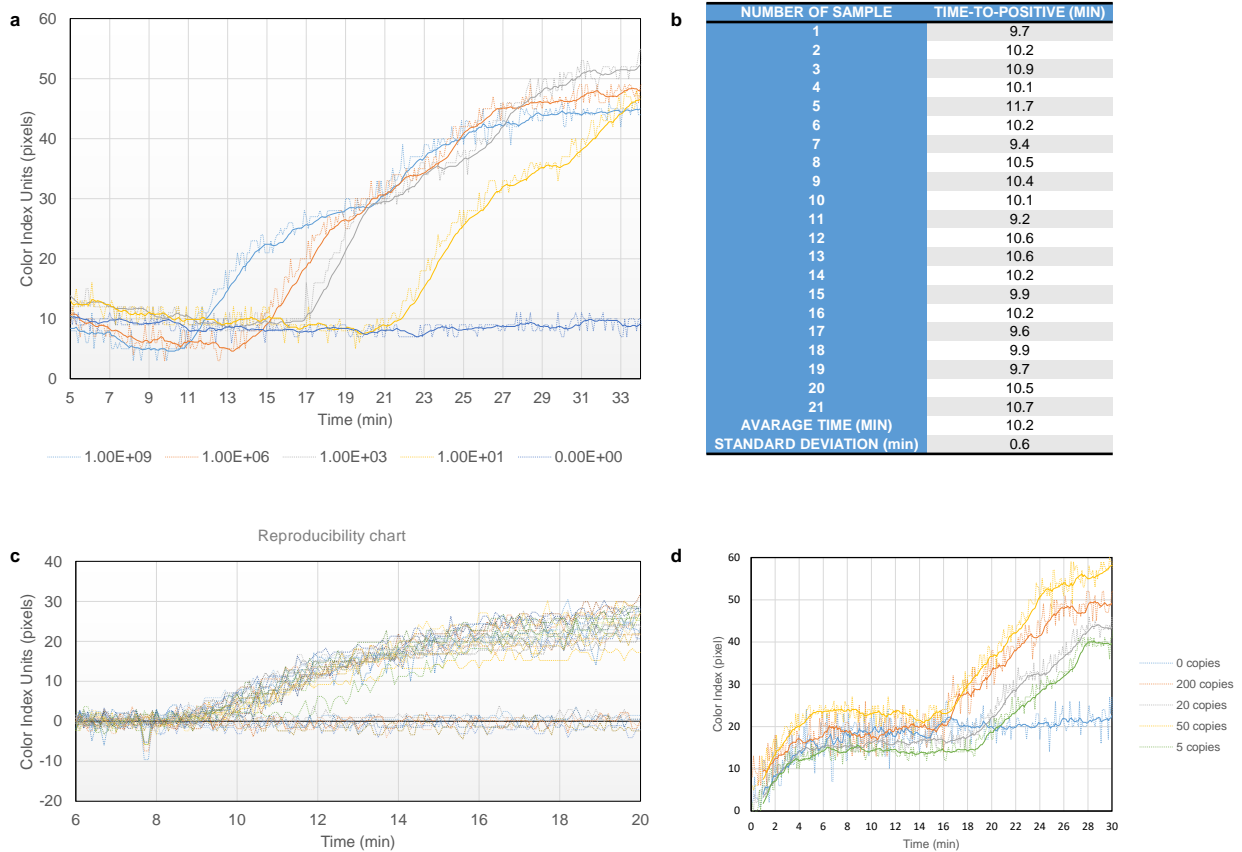

**Fig S6:** (a) Typical real time colorimetric LAMP curves for Influenza A. (b) Average time-to-positive for 21 positive samples with the same initial target concentration ( $10^9$  copies/reaction). (c) Real-time curves of 28 samples (21 positive, 7 negative). (d) Real time curves for 0 to 200 copies of SARS-CoV-2 synthetic RNA.

## Electronics design and smartphone app development

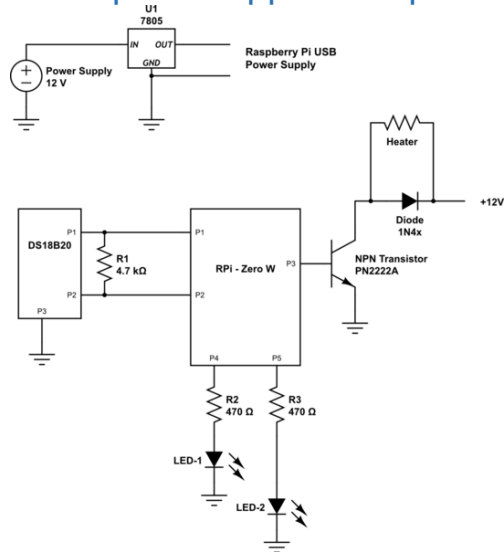

**Fig. S7:** Schematic representation of the custom PCB RPi Zero W Hat for controlling temperature sensor (DS18B20), Heating element, and LEDs.

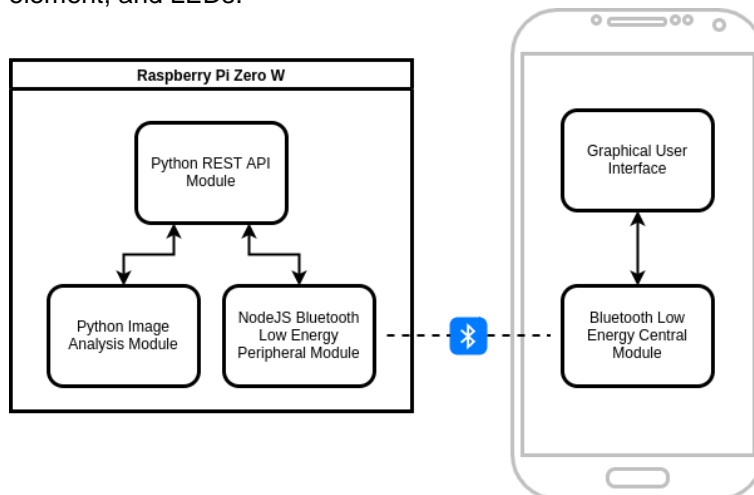

**Fig. S8:** Systems' architecture at software layer.

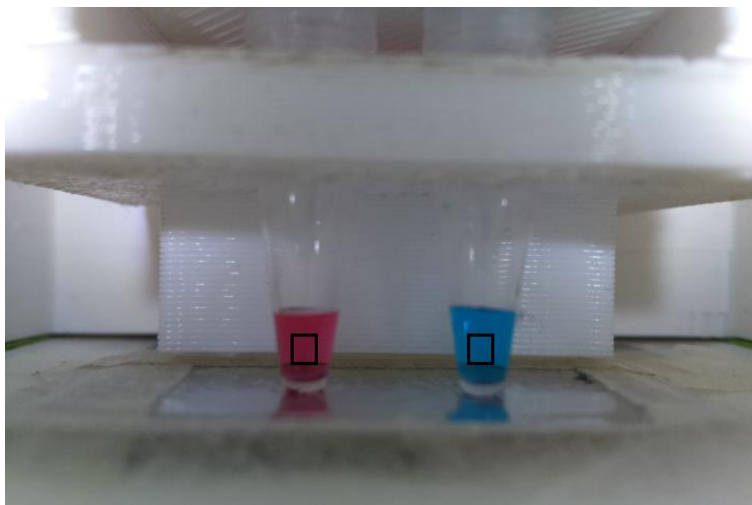

**Fig. S9:** Snapshot of the reaction tubes in the qcLAMP device. The black rectangles correspond to the analysis area.

## References

1. Papadakis, G. et al. 3D-printed Point-of-Care Platform for Genetic Testing of Infectious Diseases Directly in Human Samples Using Acoustic Sensors and a Smartphone. *ACS Sens* **4**, 1329-1336 (2019).
2. Hsieh, K.W., Patterson, A.S., Ferguson, B.S., Plaxco, K.W. & Soh, H.T. Rapid, Sensitive, and Quantitative Detection of Pathogenic DNA at the Point of Care through Microfluidic Electrochemical Quantitative Loop-Mediated Isothermal Amplification. *Angew Chem Int Edit* **51**, 4896-4900 (2012).
